# Supplementary material for: Carprofen alleviates Alzheimer-like phenotypes of 5XFAD transgenic mice by targeting the pathological hallmarks induced by amyloid-β aggregation
Source: PubMed Central journal article supplement (PMC10323003; doi:10.1038/s41598-023-36167-4), 2023-07-05
Supplement: 41598_2023_36167_MOESM1_ESM.pdf [file 41598_2023_36167_MOESM1_ESM.pdf]

# **Carprofen alleviates Alzheimer-like phenotypes of 5XFAD transgenic mice by targeting the pathological hallmarks induced by amyloid- $\beta$ aggregation**

## **Authors**

Donghee Lee<sup>1,2</sup>, Ji Eun Ryoo<sup>1,2</sup>, Seungpyo Hong<sup>1,3,4,5</sup>, Hye Yun Kim<sup>1,2</sup>, and YoungSoo Kim<sup>1,2,3,6\*</sup>

## **Affiliations**

<sup>1</sup>Department of Pharmacy, College of Pharmacy, Yonsei University, Incheon 21983, Republic of Korea.

<sup>2</sup>Yonsei Institute of Pharmaceutical Sciences, College of Pharmacy, Yonsei University, Incheon 21983, Republic of Korea.

<sup>3</sup>Yonsei Frontier Lab, Yonsei University, Seoul 03722, Republic of Korea.

<sup>4</sup>Pharmaceutical Sciences Division, School of Pharmacy, University of Wisconsin-Madison, Madison, Wisconsin, USA

<sup>5</sup>Wisconsin Center for NanoBioSystems, University of Wisconsin-Madison, Madison, Wisconsin, USA

<sup>6</sup>Department of Integrative Biotechnology and Translational Medicine, Yonsei University, Incheon 21983, Republic of Korea.

## **\*To whom correspondence should be addressed**

YoungSoo Kim; [y.kim@yonsei.ac.kr](mailto:y.kim@yonsei.ac.kr); Tel.: +82-32-749-4523; Fax: +82-32-749-4105

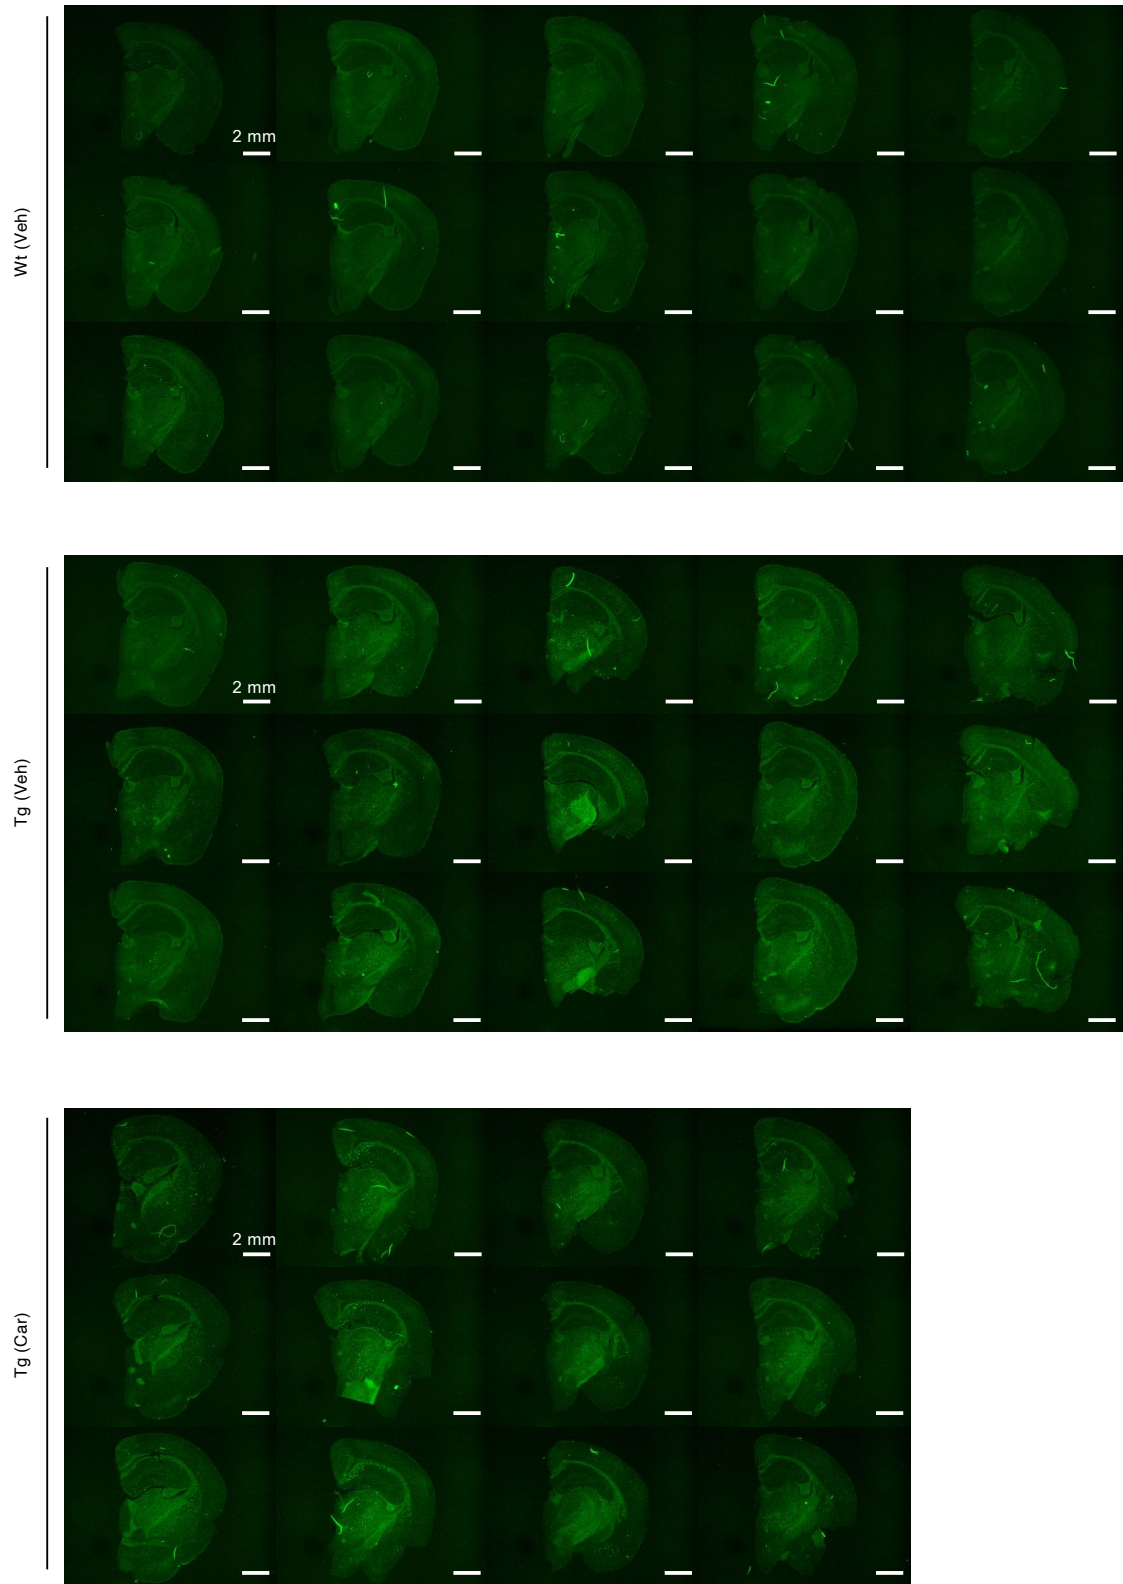

**Supplementary Figure S1.** Hemisphere images of wild-type and 5XFAD mice brains of all 3-sets of vehicle- and carprofen-treated groups. Wt: Wild-type; Tg: Transgenic; Veh: Vehicle; Car: Carprofen. Scale bar = 2 mm.

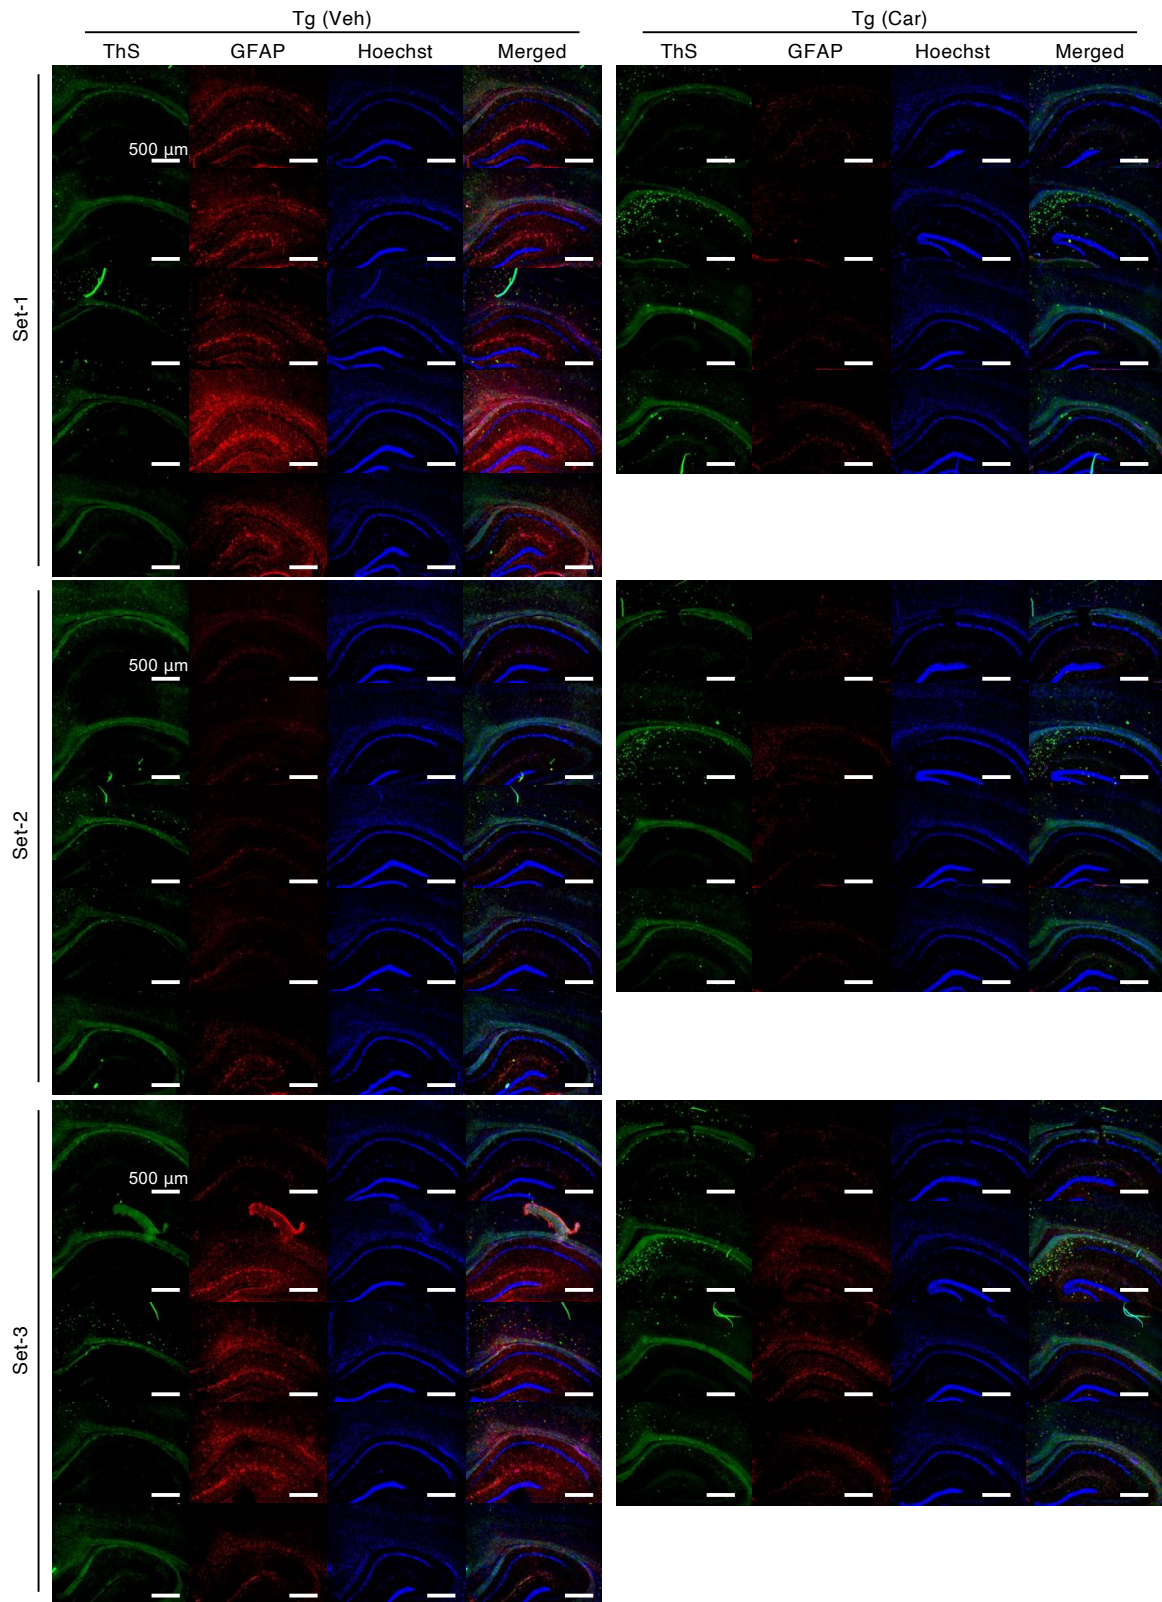

**Supplementary Figure S2.** Hippocampus images of 2.9-month-old wild-type and 5XFAD mice brains of all 3-sets of vehicle- and carprofen-treated groups. Wt: Wild-type; Tg: Transgenic; Veh: Vehicle; Car: Carprofen. Scale bar = 500 μm.

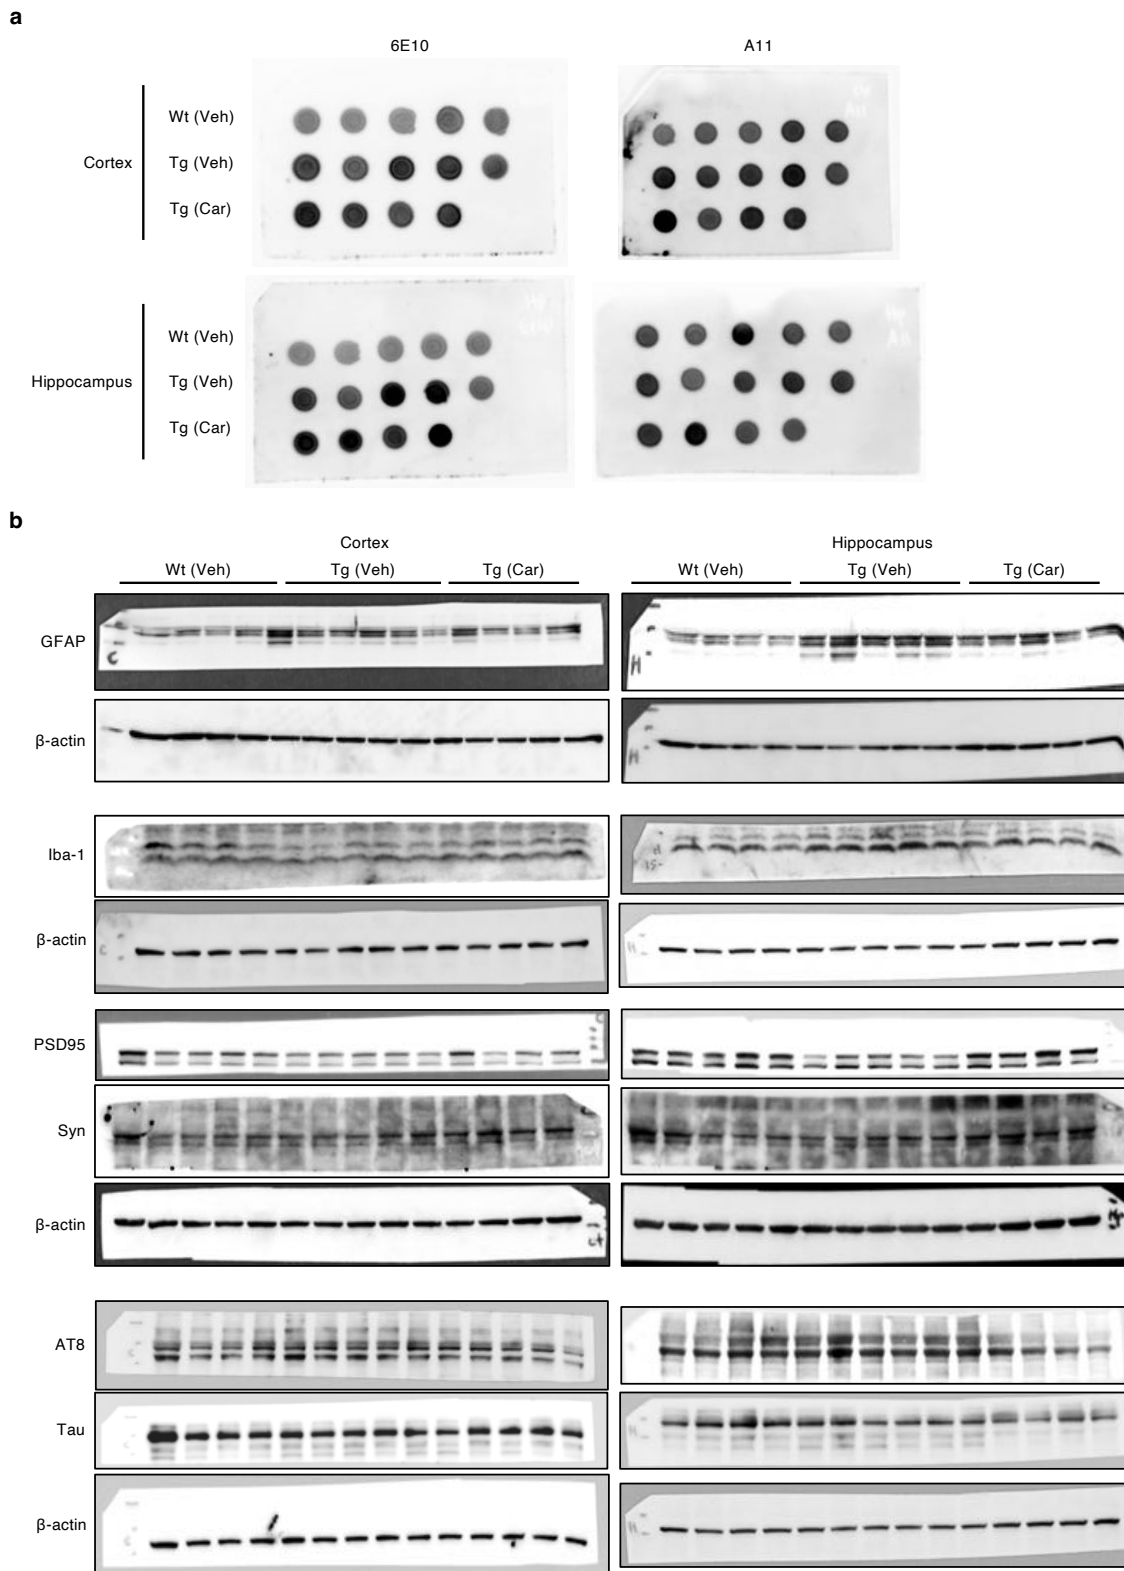

**Supplementary Figure S3. Original dot blot and full-membrane images of the immunoblot data with their respective  $\beta$ -actins. (a) Dot blot of the cortical and hippocampal brain lysates. (b) Western blot analyses assessing the expression levels of Alzheimer-like**

characteristics observed in the same membrane. GFAP and Iba-1 were each blotted on separate membranes. PSD95 and synaptophysin were blotted on the same membrane, whereas AT8 and tau were blotted on the same membrane. Wt: Wild-type; Tg: Transgenic; Car: Carprofen; Wt: Wild-type; Veh: Vehicle; Car: Carprofen; GFAP: Glial fibrillary acidic protein; Iba-1: Ionized calcium-binding adaptor molecule 1; PSD95: Post-synaptic density protein 95; Syn: Synaptophysin; AT8: Phosphorylated tau (S202, T205).

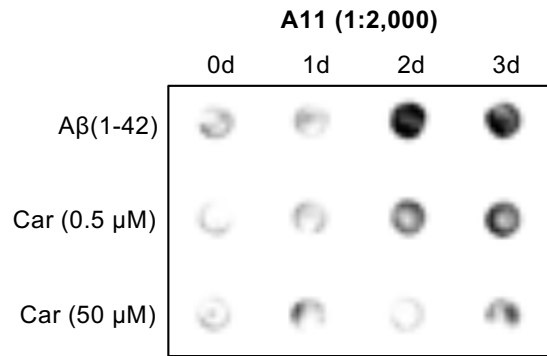

**Supplementary Figure S4.** Dot blot displaying the intensity of oligomer levels of samples mixed with carprofen (0.5 and 50  $\mu$ M) and A $\beta$ (1–42) monomer incubated at four different time-points (0-day, 1-day, 2-day, and 3-day) to select the optimal incubation time period for Y-maze test. Non-treated A $\beta$ (1–42) sample was assessed as a control. The oligomeric levels were measured by anti-oligomer antibody A11. Car: carprofen.

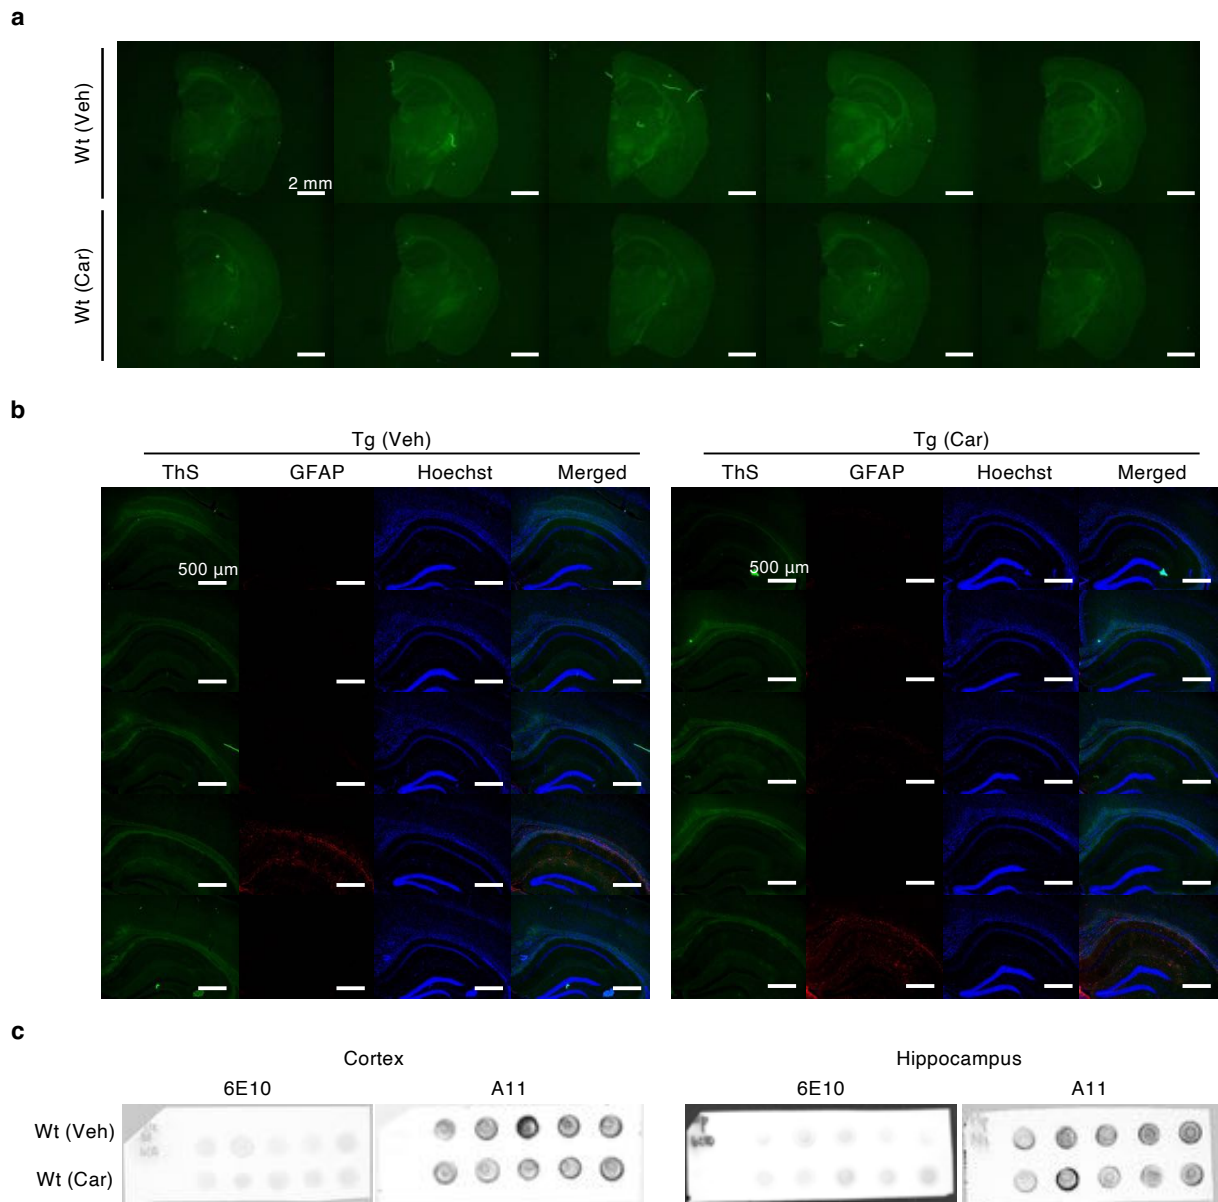

**Supplementary Figure S5. Brain images and dot blot of wild-type littermates.**

(a) Hemisphere images of wild-type littermates treated with vehicle ( $n = 5$ ) or carprofen ( $n = 5$ ). Scale bar = 2 mm. (b) Hippocampus images of wild-type littermates treated with vehicle ( $n = 5$ ) or carprofen ( $n = 5$ ). Scale bar = 500  $\mu$ m. (c) Original dot blot and the densitometry of the cortex and hippocampus of wild-type groups treated with vehicle (5% DMSO,  $n = 5$ ) or carprofen (25 mg/kg/day,  $n = 5$ ). Wt: Wild-type; Veh: Vehicle; Car: Carprofen; ns: Not significant.

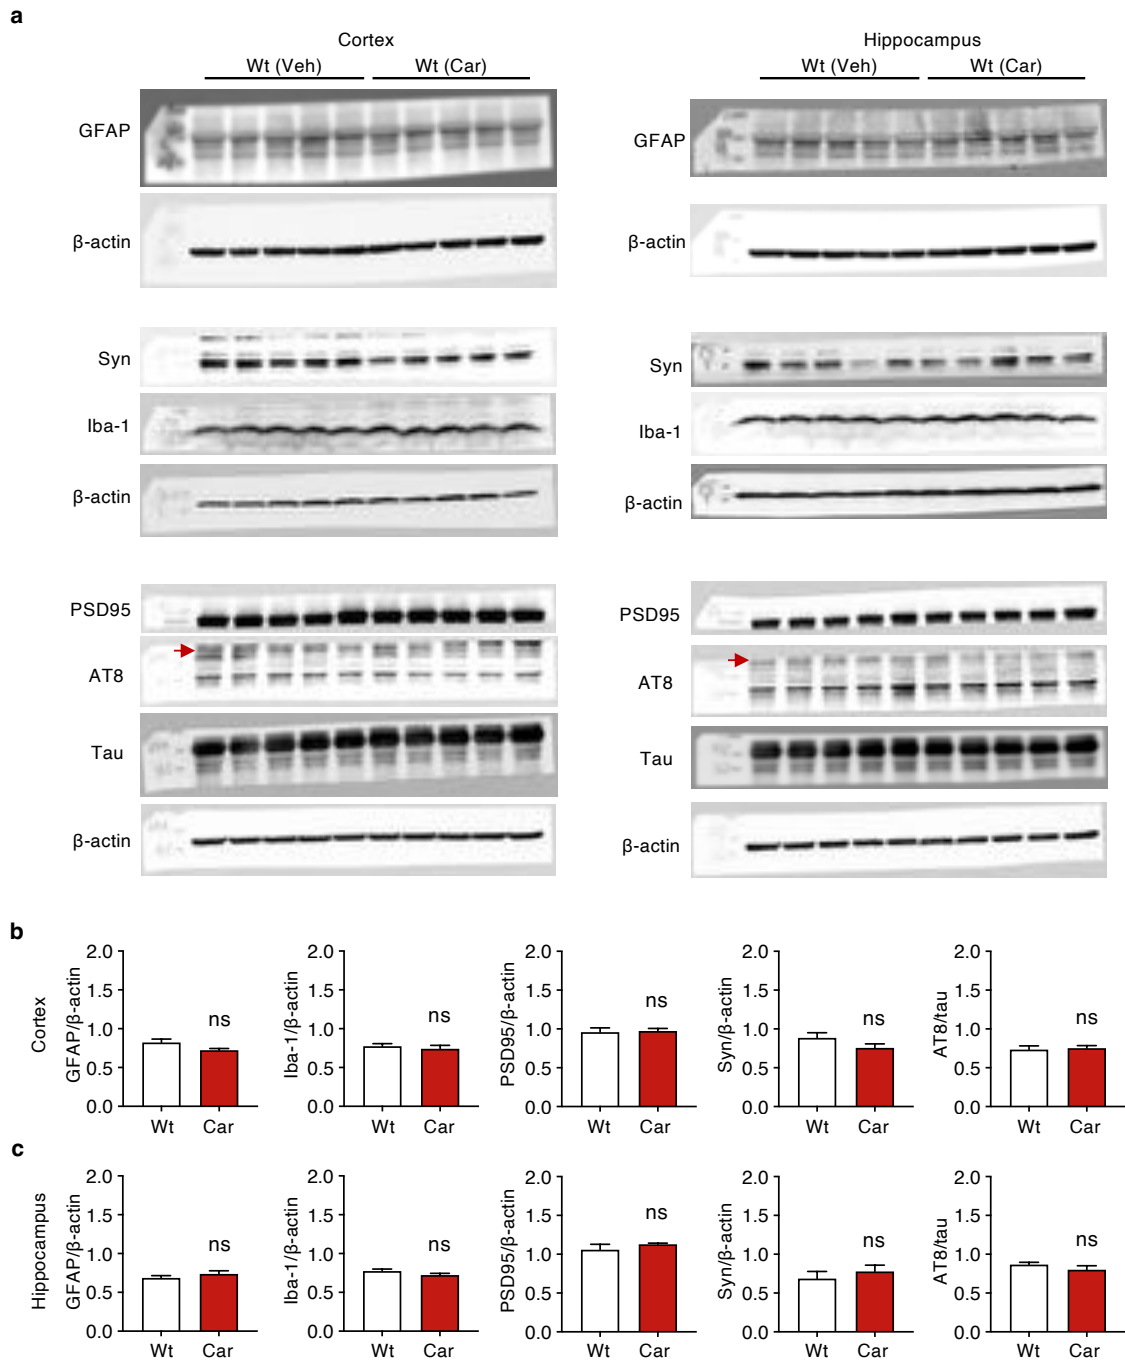

**Supplementary Figure S6. Western blot and densitometry of wild-type littermates.**

(a) Western blot analyses of the cortex and hippocampus of wild-type littermates. (b,c) Densitometry measurement of the (b) cortex and (c) hippocampus of wild-type groups treated with vehicle (5% DMSO, n = 5) or carprofen (25 mg/kg/day, n = 5). All data represent the mean  $\pm$ SEM and the statistical analyses were performed by two-tailed unpaired *t*-test (densitometry) followed by Bonferroni's post-hoc comparisons tests with the comparison to



the vehicle-treated wild-type littermate group (Wt, white) ( $*P < 0.05$ ,  $**P < 0.01$ ,  $***P < 0.001$ , other comparisons not significant). GFAP was blotted on a separate membrane. Synaptophysin and Iba-1 were blotted on the same membrane, whereas PSD95, AT8, and tau were blotted on the same membrane. Wt: Wild-type; Veh: Vehicle; Car: Carprofen; GFAP: Glial fibrillary acidic protein; Iba-1: Ionized calcium-binding adaptor molecule 1; PSD95: Post-synaptic density protein 95; Syn: Synaptophysin; AT8: Phosphorylated tau (S202, T205); ns: Not significant.
